# Supplementary material for: Impact of Difelikefalin on the Health-Related Quality of Life of Haemodialysis Patients with Moderate-To-Severe Chronic Kidney Disease-Associated Pruritus: A Single-Arm Intervention Trial
Source: Springer Nature journal article supplement (doi:10.1007/s40271-023-00668-1), 2024-01-09
Supplement: MOESM1 [file 26610096]

**Supplementary Appendix**

**Impact of Difelikefalin on the Health-Related Quality of Life of Haemodialysis Patients  
With Moderate-to-Severe Chronic Kidney Disease-Associated Pruritus**

**Authors:**

James Fotheringham, PhD<sup>1,2</sup>, Julien F Guest, PhD<sup>3</sup>, Joerg Latus, MD<sup>4</sup>, Edgar V. Lerma, MD<sup>5</sup>,  
Isabelle Morin, MSc<sup>6</sup>, Thilo Schaufler, PhD<sup>6</sup>, Marco Soro, PhD<sup>7</sup>, Sonja Ständer, MD<sup>8</sup>, Steven  
Zeig, MD<sup>9</sup>

*1 School of Health and Related Research, University of Sheffield, Sheffield, UK*

*2 Sheffield Kidney Institute, Sheffield Teaching Hospitals NHS Trust, Sheffield, UK*

*3 Catalyst Consultants, Poole, UK*

*4 Robert-Bosch-Hospital, Stuttgart, Germany*

*5 Department of Nephrology, Advocate Christ Medical Center, University of Illinois at Chicago,  
Oak Lawn, Illinois, USA*

*6 CSL Vifor, Glattbrugg, Switzerland*

*7 CSL Vifor, Rome, Italy*

*8 Münster, Germany*

*9 Pines Clinical Research, Pembroke Pines, Florida, USA*

**Corresponding author:**

James Fotheringham, PhD

School of Health and Related Research, University of Sheffield, Sheffield, UK

Sheffield Kidney Institute, Sheffield Teaching Hospitals NHS Trust, Sheffield, UK

Email: [j.fotheringham@sheffield.ac.uk](mailto:j.fotheringham@sheffield.ac.uk)

Phone: +44 114 222 4346

**Supplementary table 1. Characteristics of the study population (safety population, N=222)**

| Characteristics                                                      | Safety population<br>(N=222) |
|----------------------------------------------------------------------|------------------------------|
| Mean $\pm$ SD age (years) of patients                                | 58.1 $\pm$ 12.8              |
| Male, n (%)                                                          | 121 (54.5%)                  |
| Region, n (%)                                                        |                              |
| USA                                                                  | 203 (91.4%)                  |
| Europe                                                               | 19 (8.6%)                    |
| Mean $\pm$ SD dry body weight at baseline (kg)                       | 86.6 $\pm$ 23.5              |
| Baseline anti-itch medication use, n (%)                             | 70 (31.5%)                   |
| Mean $\pm$ SD duration of pruritus (years) <sup>a</sup>              | 3.89 $\pm$ 3.31              |
| Mean $\pm$ SD duration since diagnosis of ESRD (years) <sup>b</sup>  | 5.87 $\pm$ 4.69              |
| Mean $\pm$ SD duration on chronic haemodialysis (years) <sup>c</sup> | 5.42 $\pm$ 4.41              |
| Mean $\pm$ SD duration since diagnosis of CKD (years) <sup>d</sup>   | 8.51 $\pm$ 6.88              |
| Aetiology of chronic kidney disease, n (%) <sup>e</sup>              |                              |
| Hypertension                                                         | 135 (60.8%)                  |
| Diabetes                                                             | 110 (49.5%)                  |
| Other                                                                | 25 (11.3%)                   |
| Glomerulonephritis                                                   | 11 (5.0%)                    |
| Large vessel disease                                                 | 4 (1.8%)                     |
| Urologic                                                             | 3 (1.4%)                     |
| Cystic                                                               | 2 (0.9%)                     |
| Pyelonephritis                                                       | 2 (0.9%)                     |

|                                  |          |
|----------------------------------|----------|
| Unknown                          | 2 (0.9%) |
| Interstitial nephritis           | 1 (0.5%) |
| Nephrotic syndrome <sup>  </sup> | 1 (0.5%) |
| Tumours                          | 1 (0.5%) |
| Vasculitis                       | 1 (0.5%) |

Dialysis type at screening, n (%)

|                    |             |
|--------------------|-------------|
| Haemodialysis      | 216 (97.3%) |
| Haemodiafiltration | 6 (2.7%)    |

---

CKD, chronic kidney disease; ESRD, end-stage renal disease; SD, standard deviation

Vital signs baseline was defined as the last measurement taken on or prior to the first day of dosing.

<sup>a</sup>Duration of pruritus in years was calculated as (date of the screening visit – the start date of the pruritus + 1)/365.25.

<sup>b</sup>Years since diagnosis of ESRD was calculated as (date of the screening visit – first date of ESRD diagnosis + 1)/365.25.

<sup>c</sup>Years on chronic haemodialysis was calculated as (date of the screening visit – date of first chronic haemodialysis + 1)/365.25.

<sup>d</sup>Years since diagnosis of CKD was calculated as (date of the screening visit – first date of CKD + 1)/365.25.

<sup>e</sup>More than one item may have been checked and thus the sum can be over 100%.

<sup>||</sup>Nephrotic syndrome may present in several different kidney diseases.
